# Supplementary material for: Multiple stimuli dual-optical mode responsive hybrid copper(i) halides for advanced anti-counterfeiting and information encryption
Source: Royal Society of Chemistry journal article supplement (doi:10.1039/d4qi03036b), 2025-01-01
Supplement: d4qi03036b1.pdf [file d4qi03036b1.pdf]

## Supporting Information

### **Multiple Stimuli Dual-Optical Mode Responsive Hybrid Copper (I) Halides for Advanced Anti-counterfeiting and Information Encryption**

Yue Guo<sup>+</sup>, Yi-Fan Fu<sup>+</sup>, Jia Jing Wu\*, Jing-Li Qi, Yu-Mei Zhang, Qiao-Feng Huang, Wenlong Liu, Sheng-Ping Guo\*

School of Chemistry and Chemical Engineering, Yangzhou University, Yangzhou, Jiangsu 225002, P. R. China.

[<sup>+</sup>] These authors contributed equally to this work.

\*E-mail: spguo@yzu.edu.cn, jiajingw@yzu.edu.cn.

## Contents

**Table S1.** Crystal data and structure refinement for  $(\text{MePPh}_3)_2\text{Cu}_2\text{I}_4 \cdot \text{DMF}$  and  $(\text{MePPh}_3)_2\text{Cu}_4\text{I}_6$ .

**Table S2.** Fractional atomic coordinates and equivalent isotropic displacement parameters for  $(\text{MePPh}_3)_2\text{Cu}_2\text{I}_4 \cdot \text{DMF}$  and  $(\text{MePPh}_3)_2\text{Cu}_4\text{I}_6$ .

**Table S3.** Important bond lengths for  $(\text{MePPh}_3)_2\text{Cu}_2\text{I}_4 \cdot \text{DMF}$  and  $(\text{MePPh}_3)_2\text{Cu}_4\text{I}_6$ .

**Table S4.** Important bond angles for  $(\text{MePPh}_3)_2\text{Cu}_2\text{I}_4 \cdot \text{DMF}$  and  $(\text{MePPh}_3)_2\text{Cu}_4\text{I}_6$ .

**Table S5.** Comparison of PL parameters for  $(\text{MePPh}_3)_2\text{Cu}_2\text{I}_4 \cdot \text{DMF}$ ,  $(\text{MePPh}_3)_2\text{Cu}_4\text{I}_6$  and other copper halides.

**Table S6.** The stimulus, response mode and trigger condition of hybrid metal halides in anti-counterfeiting applications.

**Figure S1.** The simulated and experimental powder XRD patterns of (a)  $(\text{MePPh}_3)_2\text{Cu}_2\text{I}_4 \cdot \text{DMF}$  and (b)  $(\text{MePPh}_3)_2\text{Cu}_4\text{I}_6$ .

**Figure S2.** Asymmetric units and unit cell diagram of (a, b)  $(\text{MePPh}_3)_2\text{Cu}_2\text{I}_4 \cdot \text{DMF}$  and (c, d)  $(\text{MePPh}_3)_2\text{Cu}_4\text{I}_6$ .

**Figure S3.** The EDS analysis for (a)  $(\text{MePPh}_3)_2\text{Cu}_2\text{I}_4 \cdot \text{DMF}$  and (b)  $(\text{MePPh}_3)_2\text{Cu}_4\text{I}_6$ .

**Figure S4.** The bond lengths and bond angles of  $(\text{MePPh}_3)_2\text{Cu}_2\text{I}_4 \cdot \text{DMF}$ .

**Figure S5.** The bond lengths and bond angles of  $(\text{MePPh}_3)_2\text{Cu}_4\text{I}_6$ .

**Figure S6.** A detailed view of the distorted Cu cluster skeleton in  $(\text{MePPh}_3)_2\text{Cu}_4\text{I}_6$ .

**Figure S7.** The optical photographs of (a)  $(\text{MePPh}_3)_2\text{Cu}_2\text{I}_4 \cdot \text{DMF}$  and (b)  $(\text{MePPh}_3)_2\text{Cu}_4\text{I}_6$ .

**Figure S8.** The PL decay lifetime of for (a)  $(\text{MePPh}_3)_2\text{Cu}_2\text{I}_4 \cdot \text{DMF}$  and (b)  $(\text{MePPh}_3)_2\text{Cu}_4\text{I}_6$ .

**Figure S9.** Power density dependent PL intensity of (a)  $(\text{MePPh}_3)_2\text{Cu}_2\text{I}_4 \cdot \text{DMF}$  and (b)  $(\text{MePPh}_3)_2\text{Cu}_4\text{I}_6$ .

**Figure S10.** The simulated and experimental powder XRD patterns of (a)  $(\text{MePPh}_3)_2\text{Cu}_2\text{I}_4 \cdot \text{DMF}$  under ethanol stimulus.

**Figure S11.** The Powder XRD patterns of (a)  $(\text{MePPh}_3)_2\text{Cu}_2\text{I}_4 \cdot \text{DMF}$  and (b)  $(\text{MePPh}_3)_2\text{Cu}_4\text{I}_6$  after storage in the ambient air for ten days.

**Figure S12.** The time-dependent PL intensity spectra of (a, b)  $(\text{MePPh}_3)_2\text{Cu}_2\text{I}_4 \cdot \text{DMF}$  and (c, d)  $(\text{MePPh}_3)_2\text{Cu}_4\text{I}_6$  with time under the continuous irradiation with 40 W UV light.

**Figure S13.** The TGA curves of (a)  $(\text{MePPh}_3)_2\text{Cu}_2\text{I}_4 \cdot \text{DMF}$  and (b)  $(\text{MePPh}_3)_2\text{Cu}_4\text{I}_6$ .

**Table S1.** Crystal data and structure refinement for (MePPh<sub>3</sub>)<sub>2</sub>Cu<sub>2</sub>I<sub>4</sub>·DMF and (MePPh<sub>3</sub>)<sub>2</sub>Cu<sub>4</sub>I<sub>6</sub>.

| Compound                                 | (MePPh <sub>3</sub> ) <sub>2</sub> Cu <sub>2</sub> I <sub>4</sub> ·DMF                                          | (MePPh <sub>3</sub> ) <sub>2</sub> Cu <sub>4</sub> I <sub>6</sub>             |
|------------------------------------------|-----------------------------------------------------------------------------------------------------------------|-------------------------------------------------------------------------------|
| Empirical formula                        | C <sub>38</sub> H <sub>36</sub> P <sub>2</sub> Cu <sub>2</sub> I <sub>4</sub> ·C <sub>3</sub> H <sub>7</sub> NO | C <sub>38</sub> H <sub>36</sub> P <sub>2</sub> Cu <sub>4</sub> I <sub>6</sub> |
| Formula weight                           | 1262.38                                                                                                         | 1570.17                                                                       |
| Temperature /K                           | 296                                                                                                             | 296                                                                           |
| Crystal system                           | monoclinic                                                                                                      | trigonal                                                                      |
| Space group (number)                     | <i>C2/c</i>                                                                                                     | <i>R</i> <sup>3</sup> <i>c</i>                                                |
| <i>a</i> /Å                              | 24.6028(9)                                                                                                      | 13.9610(11)                                                                   |
| <i>b</i> /Å                              | 10.7595(4)                                                                                                      | 13.9610(11)                                                                   |
| <i>c</i> /Å                              | 18.9219(6)                                                                                                      | 40.083(5)                                                                     |
| <i>α</i> /Å                              | 90                                                                                                              | 90                                                                            |
| <i>β</i> /Å                              | 116.4580(10)                                                                                                    | 90                                                                            |
| <i>γ</i> /Å                              | 90                                                                                                              | 120                                                                           |
| Volume/ Å <sup>3</sup>                   | 4484.3(3)                                                                                                       | 6765.9(13)                                                                    |
| <i>Z</i>                                 | 4                                                                                                               | 6                                                                             |
| $\rho_{\text{calc}}$ /g·cm <sup>-3</sup> | 1.87                                                                                                            | 2.312                                                                         |
| $\mu$ /mm <sup>-1</sup>                  | 3.804                                                                                                           | 6.064                                                                         |
| <i>F</i> (000)                           | 2416                                                                                                            | 4368.0                                                                        |
| Radiation                                | MoK <sub>α</sub> ( $\lambda$ = 0.71073 Å)                                                                       |                                                                               |
| $2\theta$ range /°                       | 4.214 - 58.442                                                                                                  | 5.28 - 52.752                                                                 |
|                                          | -33 ≤ <i>h</i> ≤ 33                                                                                             | -17 ≤ <i>h</i> ≤ 17                                                           |
| Index ranges                             | -14 ≤ <i>k</i> ≤ 14                                                                                             | -17 ≤ <i>k</i> ≤ 17                                                           |
|                                          | -25 ≤ <i>l</i> ≤ 25                                                                                             | -50 ≤ <i>l</i> ≤ 49                                                           |
| Reflections collected                    | 36008                                                                                                           | 28262                                                                         |
| Independent reflections                  | 6070 [ <i>R</i> <sub>int</sub> = 0.0343, <i>R</i> <sub>sigma</sub> = 0.0276]                                    | 1545 [ <i>R</i> <sub>int</sub> = 0.0483, <i>R</i> <sub>sigma</sub> = 0.0194]  |
| Data / Restraints / Parameters           | 6070/57/256                                                                                                     | 1545/0/83                                                                     |

**Table S1.** Crystal data and structure refinement for (MePPh<sub>3</sub>)<sub>2</sub>Cu<sub>2</sub>I<sub>4</sub>·DMF and (MePPh<sub>3</sub>)<sub>2</sub>Cu<sub>4</sub>I<sub>6</sub>.

| Compound                                  | (MePPh <sub>3</sub> ) <sub>2</sub> Cu <sub>2</sub> I <sub>4</sub> ·DMF | (MePPh <sub>3</sub> ) <sub>2</sub> Cu <sub>4</sub> I <sub>6</sub> |
|-------------------------------------------|------------------------------------------------------------------------|-------------------------------------------------------------------|
| Goodness-of-fit on $F^2$                  | 1.025                                                                  | 1.076                                                             |
| Final $R$ indexes [ $I \geq 2\sigma(I)$ ] | $R_1 = 0.0426$ , $wR_2 = 0.0881$                                       | $R_1 = 0.0276$ , $wR_2 = 0.0552$                                  |
| Final $R$ indexes [all data]              | $R_1 = 0.0745$ , $wR_2 = 0.1004$                                       | $R_1 = 0.0437$ , $wR_2 = 0.0607$                                  |
| Largest peak/hole /eÅ <sup>-3</sup>       | 1.14/-1.46                                                             | 0.67/-0.70                                                        |

$R_1 = \Sigma||F_o| - |F_c|| / \Sigma|F_o|$ ,  $wR_2 = \{\Sigma[w(|F_o|^2 - |F_c|^2)^2] / \Sigma[w(|F_o|^4)]\}^{1/2}$  and  $w = 1/[\sigma^2(F_o^2) + (0.0462P)^2]$  where  $P = (F_o^2 + 2F_c^2)/3$

**Table S2.** Fractional atomic coordinates and equivalent isotropic displacement parameters ( $\text{\AA}^2$ ) for  $(\text{MePPh}_3)_2\text{Cu}_2\text{I}_4 \cdot \text{DMF}$  and  $(\text{MePPh}_3)_2\text{Cu}_4\text{I}_6$ .  $U_{eq}$  is defined as 1/3 of the trace of the orthogonalised  $U_{ij}$  tensor.

| Atom                                                       | $x$        | $y$       | $z$       | $U_{eq}$  |
|------------------------------------------------------------|------------|-----------|-----------|-----------|
| $(\text{MePPh}_3)_2\text{Cu}_2\text{I}_4 \cdot \text{DMF}$ |            |           |           |           |
| I (1)                                                      | 5098.1(2)  | 1719.2(3) | 646.0(2)  | 57.30(11) |
| I (2)                                                      | 6668.3(2)  | 89.2(4)   | 316.3(3)  | 84.06(15) |
| Cu (1)                                                     | 5603.1(3)  | 105.1(6)  | 135.4(3)  | 59.17(16) |
| P (1)                                                      | 6043.2(4)  | 5436.7(9) | 1595.9(5) | 35.6(2)   |
| C (7)                                                      | 6354.3(17) | 5233(4)   | 908(2)    | 37.9(8)   |
| C (6)                                                      | 6364.7(18) | 6801(3)   | 2180(2)   | 39.1(8)   |
| C (13)                                                     | 6209.7(18) | 4127(3)   | 2241(2)   | 38.9(8)   |
| C (19)                                                     | 5237.7(18) | 5599(4)   | 1052(2)   | 47.1(9)   |
| C (8)                                                      | 6306.7(19) | 4096(4)   | 540(2)    | 46.9(9)   |
| C (12)                                                     | 6609(2)    | 6247(4)   | 706(3)    | 50.7(10)  |
| C (1)                                                      | 6845.3(19) | 6671(4)   | 2927(2)   | 48.0(10)  |
| C (5)                                                      | 6154(2)    | 7976(4)   | 1892(3)   | 53.5(11)  |
| C (2)                                                      | 7099(2)    | 7707(5)   | 3380(3)   | 60.6(12)  |
| C (18)                                                     | 6708(2)    | 3381(4)   | 2417(3)   | 57.9(11)  |
| C (9)                                                      | 6514(2)    | 3970(5)   | -26(3)    | 56.0(11)  |
| C (14)                                                     | 5841(2)    | 3896(4)   | 2602(3)   | 55.1(11)  |
| C (3)                                                      | 6892(2)    | 8866(4)   | 3090(3)   | 60.5(12)  |
| C (10)                                                     | 6772(2)    | 4973(5)   | -215(3)   | 64.6(13)  |
| C (4)                                                      | 6427(2)    | 9003(4)   | 2349(3)   | 62.7(12)  |
| C (15)                                                     | 5971(3)    | 2919(5)   | 3129(3)   | 69.2(14)  |
| C (11)                                                     | 6817(2)    | 6097(5)   | 144(3)    | 65.5(13)  |
| C (16)                                                     | 6465(3)    | 2192(5)   | 3295(3)   | 71.8(15)  |
| C (17)                                                     | 6831(3)    | 2411(5)   | 2942(3)   | 74.7(15)  |

**Table S2.** Fractional atomic coordinates and equivalent isotropic displacement parameters ( $\text{\AA}^2$ ) for  $(\text{MePPh}_3)_2\text{Cu}_2\text{I}_4 \cdot \text{DMF}$  and  $(\text{MePPh}_3)_2\text{Cu}_4\text{I}_6$ .  $U_{eq}$  is defined as 1/3 of the trace of the orthogonalised  $U_{ij}$  tensor.

| Atom                                      | <i>x</i>   | <i>y</i>  | <i>z</i>   | $U_{eq}$  |
|-------------------------------------------|------------|-----------|------------|-----------|
| C (22)                                    | 5294(5)    | 7661(9)   | 2888(6)    | 62(2)     |
| O (1)                                     | 5169(5)    | 6580(6)   | 2688(5)    | 75(3)     |
| N (1)                                     | 5031(9)    | 8639(6)   | 2429(8)    | 50(3)     |
| C (21)                                    | 5202(6)    | 9902(8)   | 2717(8)    | 81(4)     |
| C (20)                                    | 4540(5)    | 8470(12)  | 1643(6)    | 78(3)     |
| $(\text{MePPh}_3)_2\text{Cu}_4\text{I}_6$ |            |           |            |           |
| I (1)                                     | 10568.4(3) | 2028.6(2) | 5466.8(2)  | 54.98(12) |
| P (1)                                     | 6666.67    | 3333.33   | 5057.4(4)  | 38.0(4)   |
| Cu (1)                                    | 9094.8(8)  | 375.2(9)  | 5147.6(2)  | 48.7(3)   |
| Cu (2)                                    | 10000      | 0         | 5409.6(4)  | 47.6(4)   |
| C (2)                                     | 6249(3)    | 1972(3)   | 5207.4(9)  | 41.4(9)   |
| C (7)                                     | 6666.67    | 3333.33   | 4611.2(16) | 64(2)     |
| C (3)                                     | 5430(4)    | 1467(4)   | 5437.6(12) | 63.9(13)  |
| C (1)                                     | 6801(5)    | 1440(4)   | 5100.9(13) | 72.9(15)  |
| C (5)                                     | 5738(5)    | -52(4)    | 5466.8(13) | 75.1(15)  |
| C (4)                                     | 5177(5)    | 445(4)    | 5567.2(13) | 82.0(16)  |
| C (6)                                     | 6541(5)    | 421(4)    | 5231.7(15) | 86.0(17)  |

**Table S3.** Important bond lengths for (MePPh<sub>3</sub>)<sub>2</sub>Cu<sub>2</sub>I<sub>4</sub>·DMF and (MePPh<sub>3</sub>)<sub>2</sub>Cu<sub>4</sub>I<sub>6</sub>.

| Atom                                                                   | Atom                | Length/Å   | Atom   | Atom                | Length/Å   |
|------------------------------------------------------------------------|---------------------|------------|--------|---------------------|------------|
| (MePPh <sub>3</sub> ) <sub>2</sub> Cu <sub>2</sub> I <sub>4</sub> ·DMF |                     |            |        |                     |            |
| Cu (1)                                                                 | I (1)               | 2.5619(7)  | P (1)  | C (7)               | 1.794(4)   |
| Cu (1)                                                                 | I (2)               | 2.4871(7)  | P (1)  | C (6)               | 1.795(4)   |
| Cu (1 <sup>1</sup> )                                                   | I (1)               | 2.5965(7)  | P (1)  | C (13)              | 1.788(4)   |
| Cu (1)                                                                 | Cu (1) <sup>1</sup> | 2.7865(12) | P (1)  | C (19)              | 1.789(4)   |
| (MePPh <sub>3</sub> ) <sub>2</sub> Cu <sub>4</sub> I <sub>6</sub>      |                     |            |        |                     |            |
| I (1)                                                                  | Cu (1)              | 2.5395(11) | Cu (1) | Cu (1) <sup>4</sup> | 1.9834(14) |
| I (1)                                                                  | Cu (1) <sup>2</sup> | 2.6359(10) | Cu (1) | Cu (1) <sup>5</sup> | 2.7568(17) |
| I (1)                                                                  | Cu (1) <sup>3</sup> | 2.5775(11) | Cu (1) | Cu (2)              | 1.9070(13) |
| I (1)                                                                  | Cu (2)              | 2.5408(4)  | Cu (1) | Cu (2) <sup>6</sup> | 2.7427(16) |
| Cu (1)                                                                 | Cu (1) <sup>2</sup> | 1.9834(14) | Cu (1) | Cu (1) <sup>3</sup> | 2.7568(17) |

Symmetry code 1: 1-x, -y, -z; 2: 1+y, 1-x+y, 1-z; 3: 2+y-x, 1-x, +z; 4: -y+x, -1+x, 1-z; 5: 1-y, -1+x-y, +z; 6: 2-x, -y, 1-z.

**Table S4.** Important bond angles for (MePPh<sub>3</sub>)<sub>2</sub>Cu<sub>2</sub>I<sub>4</sub>·DMF and (MePPh<sub>3</sub>)<sub>2</sub>Cu<sub>4</sub>I<sub>6</sub>.

| Atom                                                                   | Atom   | Atom                | Angle/°   | Atom                | Atom   | Atom                | Angle/°     |
|------------------------------------------------------------------------|--------|---------------------|-----------|---------------------|--------|---------------------|-------------|
| (MePPh <sub>3</sub> ) <sub>2</sub> Cu <sub>2</sub> I <sub>4</sub> ·DMF |        |                     |           |                     |        |                     |             |
| Cu (1)                                                                 | I (1)  | Cu (1) <sup>1</sup> | 65.39(2)  | I (2)               | Cu (1) | I (1)               | 117.72(3)   |
| I (1)                                                                  | Cu (1) | I (1) <sup>1</sup>  | 114.61(2) | I (2)               | Cu (1) | I (1)               | 127.66(3)   |
| I (1) <sup>1</sup>                                                     | Cu (1) | Cu (1) <sup>1</sup> | 56.70(2)  | I (2)               | Cu (1) | Cu (1) <sup>1</sup> | 174.40(4)   |
| I (1)                                                                  | Cu (1) | Cu (1) <sup>1</sup> | 57.91(2)  |                     |        |                     |             |
| (MePPh <sub>3</sub> ) <sub>2</sub> Cu <sub>4</sub> I <sub>6</sub>      |        |                     |           |                     |        |                     |             |
| Cu (1)                                                                 | I (1)  | Cu (1) <sup>2</sup> | 65.19(4)  | Cu (2)              | Cu (1) | Cu (1) <sup>7</sup> | 89.64(4)    |
| Cu (1) <sup>2</sup>                                                    | I (1)  | Cu (1) <sup>3</sup> | 44.70(3)  | Cu (2)              | Cu (1) | Cu (2) <sup>8</sup> | 87.95(7)    |
| Cu (1)                                                                 | I (1)  | Cu (1) <sup>3</sup> | 45.02(3)  | I (1) <sup>6</sup>  | Cu (2) | I (1)               | 119.196(11) |
| Cu (1)                                                                 | I (1)  | Cu (2)              | 44.09(3)  | I (1) <sup>6</sup>  | Cu (2) | I (1) <sup>1</sup>  | 119.197(11) |
| Cu (2)                                                                 | I (1)  | Cu (1) <sup>2</sup> | 43.74(3)  | I (1) <sup>2</sup>  | Cu (2) | I (1)               | 119.196(11) |
| Cu (2)                                                                 | I (1)  | Cu (1) <sup>3</sup> | 63.96(4)  | I (1) <sup>2</sup>  | Cu (2) | Cu (1) <sup>8</sup> | 59.70(3)    |
| I (1)                                                                  | Cu (1) | I (1) <sup>6</sup>  | 117.86(4) | I (1)               | Cu (2) | Cu (1) <sup>7</sup> | 110.82(4)   |
| I (1)                                                                  | Cu (1) | I (1) <sup>7</sup>  | 121.59(4) | I (1) <sup>6</sup>  | Cu (2) | Cu (1) <sup>3</sup> | 111.68(4)   |
| I (1) <sup>6</sup>                                                     | Cu (1) | I (1) <sup>7</sup>  | 120.11(4) | I (1)               | Cu (2) | Cu (1) <sup>3</sup> | 59.71(3)    |
| I (1) <sup>6</sup>                                                     | Cu (1) | Cu (1) <sup>2</sup> | 107.97(3) | I (1) <sup>2</sup>  | Cu (2) | Cu (1) <sup>3</sup> | 110.81(4)   |
| I (1)                                                                  | Cu (1) | Cu (1) <sup>2</sup> | 58.07(4)  | I (1) <sup>2</sup>  | Cu (2) | Cu (1) <sup>7</sup> | 111.68(4)   |
| I (1) <sup>7</sup>                                                     | Cu (1) | Cu (1) <sup>6</sup> | 107.56(3) | I (1) <sup>6</sup>  | Cu (2) | Cu (1) <sup>7</sup> | 59.70(3)    |
| I (1) <sup>6</sup>                                                     | Cu (1) | Cu (1) <sup>6</sup> | 56.73(4)  | I (1)               | Cu (2) | Cu (1) <sup>8</sup> | 111.68(4)   |
| I (1)                                                                  | Cu (1) | Cu (1) <sup>6</sup> | 109.09(3) | I (1) <sup>6</sup>  | Cu (2) | Cu (1) <sup>8</sup> | 110.82(4)   |
| I (1) <sup>7</sup>                                                     | Cu (1) | Cu (1) <sup>2</sup> | 108.37(3) | Cu (1)              | Cu (2) | I (1)               | 67.91(3)    |
| I (1) <sup>7</sup>                                                     | Cu (1) | Cu (2) <sup>8</sup> | 56.34(3)  | Cu (1) <sup>2</sup> | Cu (2) | I (1)               | 69.15(3)    |
| I (1) <sup>6</sup>                                                     | Cu (1) | Cu (2) <sup>8</sup> | 108.89(4) | Cu (1)              | Cu (2) | I (1) <sup>2</sup>  | 151.74(8)   |
| I (1)                                                                  | Cu (1) | Cu (2) <sup>8</sup> | 110.04(4) | Cu (1)              | Cu (2) | I (1) <sup>6</sup>  | 69.15(3)    |
| Cu (1) <sup>3</sup>                                                    | Cu (1) | I (1)               | 70.06(4)  | Cu (1) <sup>6</sup> | Cu (2) | I (1) <sup>6</sup>  | 67.91(3)    |
| Cu (1) <sup>3</sup>                                                    | Cu (1) | I (1) <sup>6</sup>  | 146.73(4) | Cu (1) <sup>2</sup> | Cu (2) | I (1) <sup>2</sup>  | 67.91(3)    |



**Table S4.** Important bond angles for (MePPh<sub>3</sub>)<sub>2</sub>Cu<sub>2</sub>I<sub>4</sub>·DMF and (MePPh<sub>3</sub>)<sub>2</sub>Cu<sub>4</sub>I<sub>6</sub>.

| Atom                | Atom   | Atom                | Angle/°   | Atom                | Atom   | Atom                | Angle/°   |
|---------------------|--------|---------------------|-----------|---------------------|--------|---------------------|-----------|
| Cu (1) <sup>7</sup> | Cu (1) | I (1) <sup>7</sup>  | 64.92(5)  | Cu (1) <sup>2</sup> | Cu (2) | I (1) <sup>6</sup>  | 151.75(8) |
| Cu (1) <sup>7</sup> | Cu (1) | I (1)               | 148.07(4) | Cu (1) <sup>6</sup> | Cu (2) | I (1)               | 151.75(8) |
| Cu (1) <sup>7</sup> | Cu (1) | I (1) <sup>6</sup>  | 69.20(4)  | Cu (1) <sup>6</sup> | Cu (2) | I (1) <sup>2</sup>  | 69.15(3)  |
| Cu (1) <sup>3</sup> | Cu (1) | I (1) <sup>7</sup>  | 66.10(5)  | Cu (1) <sup>6</sup> | Cu (2) | Cu (1) <sup>2</sup> | 92.58(7)  |
| Cu (1) <sup>3</sup> | Cu (1) | Cu (1) <sup>6</sup> | 90.000(1) | Cu (1) <sup>6</sup> | Cu (2) | Cu (1) <sup>3</sup> | 92.06(7)  |
| Cu (1) <sup>3</sup> | Cu (1) | Cu (1) <sup>2</sup> | 45.97(3)  | Cu (1) <sup>6</sup> | Cu (2) | Cu (1) <sup>8</sup> | 46.31(3)  |
| Cu (1) <sup>6</sup> | Cu (1) | Cu (1) <sup>2</sup> | 60        | Cu (1) <sup>7</sup> | Cu (2) | Cu (1) <sup>8</sup> | 60.34(5)  |
| Cu (1) <sup>3</sup> | Cu (1) | Cu (1) <sup>7</sup> | 88.05(7)  | Cu (1)              | Cu (2) | Cu (1) <sup>7</sup> | 46.31(3)  |
| Cu (1) <sup>7</sup> | Cu (1) | Cu (1) <sup>2</sup> | 90        | Cu (1)              | Cu (2) | Cu (1) <sup>3</sup> | 46.31(3)  |
| Cu (1) <sup>7</sup> | Cu (1) | Cu (1) <sup>6</sup> | 45.97(3)  | Cu (1) <sup>3</sup> | Cu (2) | Cu (1) <sup>8</sup> | 60.34(5)  |
| Cu (1) <sup>7</sup> | Cu (1) | Cu (2) <sup>8</sup> | 44.05(3)  | Cu (1) <sup>6</sup> | Cu (2) | Cu (1)              | 92.58(7)  |
| Cu (1) <sup>3</sup> | Cu (1) | Cu (2) <sup>8</sup> | 44.05(3)  | Cu (1) <sup>2</sup> | Cu (2) | Cu (1) <sup>3</sup> | 46.31(3)  |
| Cu (2)              | Cu (1) | I (1) <sup>6</sup>  | 67.10(3)  | Cu (1) <sup>2</sup> | Cu (2) | Cu (1)              | 92.58(7)  |
| Cu (2)              | Cu (1) | I (1)               | 67.99(3)  | Cu (1) <sup>6</sup> | Cu (2) | Cu (1) <sup>7</sup> | 46.31(3)  |
| Cu (2)              | Cu (1) | I (1) <sup>7</sup>  | 144.27(6) | Cu (1) <sup>2</sup> | Cu (2) | Cu (1) <sup>7</sup> | 92.06(7)  |
| Cu (2) <sup>8</sup> | Cu (1) | Cu (1) <sup>2</sup> | 59.83(2)  | Cu (1)              | Cu (2) | Cu (1) <sup>8</sup> | 92.06(7)  |
| Cu (2)              | Cu (1) | Cu (1) <sup>6</sup> | 43.71(3)  | Cu (1) <sup>3</sup> | Cu (2) | Cu (1) <sup>7</sup> | 60.34(5)  |
| Cu (2)              | Cu (1) | Cu (1) <sup>2</sup> | 43.71(3)  | Cu (1) <sup>2</sup> | Cu (2) | Cu (1) <sup>8</sup> | 46.32(3)  |
| Cu (2) <sup>8</sup> | Cu (1) | Cu (1) <sup>6</sup> | 59.83(2)  | Cu (2)              | Cu (1) | Cu (1) <sup>3</sup> | 89.64(4)  |

Symmetry code 1: 1-x, -y, -z; 2: 2+y-x, 1-x, +z; 3: 1+y, 1-x+y, 1-z; 4: 1+y-x, 1-x, +z; 5: 1-y, +x-y, +z; 6: 1-y, -1+x-y, +z; 7: -y+x, -1+x, 1-z; 8: 2-x, -y, 1-z.

**Table S5.** Comparison of PL parameters for (MePPh<sub>3</sub>)<sub>2</sub>Cu<sub>2</sub>I<sub>4</sub>·DMF, (MePPh<sub>3</sub>)<sub>2</sub>Cu<sub>4</sub>I<sub>6</sub> and other copper halides.

| Compound                                                                                          | PL/nm | PLQY/% | $\sigma^2$ | $\Delta d$            | Ref       |
|---------------------------------------------------------------------------------------------------|-------|--------|------------|-----------------------|-----------|
| (MePPh <sub>3</sub> ) <sub>2</sub> Cu <sub>2</sub> I <sub>4</sub> ·DMF                            | 480   | 3.78   | 46.54      | $2.11 \times 10^{-4}$ | This work |
| (Bmpip) <sub>2</sub> Cu <sub>2</sub> Br <sub>4</sub>                                              | 620   | 48.2   | 36.73      | $5.61 \times 10^{-4}$ | [1]       |
| (TEP) <sub>2</sub> Cu <sub>2</sub> Br <sub>4</sub>                                                | 503   | 92     | 119.98     | $1.12 \times 10^{-3}$ | [2]       |
| [N(C <sub>2</sub> H <sub>5</sub> ) <sub>4</sub> ] <sub>2</sub> Cu <sub>2</sub> Br <sub>4</sub>    | 463   | 97.08  | 141.75     | $6.5 \times 10^{-4}$  | [3]       |
| (MePPh <sub>3</sub> ) <sub>2</sub> Cu <sub>4</sub> I <sub>6</sub>                                 | 536   | 77.56  | 3.557      | $2.35 \times 10^{-4}$ | This work |
|                                                                                                   |       |        | 0.972      | 0                     |           |
| (TPP) <sub>2</sub> Cu <sub>4</sub> I <sub>6</sub> ·2DMSO                                          | 515   | 99.5   | 19.13      | $7.01 \times 10^{-6}$ | [4]       |
|                                                                                                   |       |        | 3.38       | $1.94 \times 10^{-5}$ |           |
| [N(C <sub>3</sub> H <sub>7</sub> ) <sub>4</sub> ] <sub>2</sub> [Cu <sub>4</sub> Br <sub>6</sub> ] | 664   | 97     | 5.16       | $2.25 \times 10^{-5}$ | [5]       |
|                                                                                                   |       |        | 4.15       | $8.88 \times 10^{-6}$ |           |
|                                                                                                   |       |        | 3.80       | $4.3 \times 10^{-6}$  |           |
|                                                                                                   |       |        | 1.30       | $1.34 \times 10^{-5}$ |           |
| (C <sub>20</sub> H <sub>20</sub> P) <sub>2</sub> Cu <sub>4</sub> Br <sub>6</sub>                  | 580   | 76.59  | 6.61       | $1.88 \times 10^{-4}$ | [6]       |
|                                                                                                   |       |        | 4.02       | $1.47 \times 10^{-3}$ |           |
|                                                                                                   |       |        | 12.27      | $7.25 \times 10^{-5}$ |           |
|                                                                                                   |       |        | 19.71      | $7.97 \times 10^{-4}$ |           |

**Table S6.** The stimulus, response mode and trigger condition of hybrid metal halides in anti-counterfeiting applications.

| Compounds                                                              | Stimulus                              | Response mode               | Trigger Condition   | Ref.      |
|------------------------------------------------------------------------|---------------------------------------|-----------------------------|---------------------|-----------|
| (MePPh <sub>3</sub> ) <sub>2</sub> Cu <sub>2</sub> I <sub>4</sub> ·DMF | Solvent-induced                       | Dual response (UV+PL)       | Naked eye /UV light | This work |
| (TEP) <sub>2</sub> Cu <sub>2</sub> Br <sub>4</sub>                     | Solvent-induced                       | Mono response (PL)          | UV light            | [2]       |
| (TEP) <sub>2</sub> Cu <sub>4</sub> Br <sub>6</sub>                     | Solvent-induced                       | Mono response (PL)          | UV light            | [2]       |
| [ETPP] <sub>2</sub> Cu <sub>4</sub> Br <sub>6</sub>                    | Thermo-induced                        | Triple response (PL+RL+SHG) | UV/Blue light       | [7]       |
| [ETPP]CuBr <sub>2</sub>                                                | Solvent-induced                       | Triple response (PL+RL+SHG) | UV/Blue light       | [7]       |
| (TPA)CuBr <sub>2</sub>                                                 | Solvent-induced                       | Mono response (PL)          | UV light            | [8]       |
| (TPA) <sub>2</sub> Cu <sub>4</sub> Br <sub>6</sub>                     | Thermo-induced                        | Mono response (PL)          | UV light            | [8]       |
| [Ph <sub>3</sub> EtP] <sub>2</sub> Sb <sub>2</sub> Cl <sub>8</sub>     | Solvent-induced                       | Mono response (PL)          | UV light            | [9]       |
| [Ph <sub>3</sub> EtP] <sub>2</sub> SbCl <sub>5</sub> ·EtOH             | Thermo-induced                        | Mono response (PL)          | UV light            | [9]       |
| [Ph <sub>3</sub> EtP] <sub>2</sub> SbCl <sub>5</sub>                   | Solvent-induced                       | Mono response (PL)          | UV light            | [9]       |
| (PPZ) <sub>2</sub> SbCl <sub>7</sub> ·5H <sub>2</sub> O                | Solvent-induced                       | Mono response (PL)          | UV light            | [10]      |
| [Bzmim] <sub>3</sub> SbCl <sub>6</sub>                                 | Thermo-induced                        | Mono response (PL)          | UV light            | [11]      |
| [Bzmim] <sub>2</sub> SbCl <sub>5</sub>                                 | Solvent-induced                       | Mono response (PL)          | UV light            | [11]      |
| (C <sub>9</sub> H <sub>15</sub> N <sub>3</sub> )SbCl <sub>5</sub>      | Solvent-induced                       | Mono response (PL)          | UV light            | [4]       |
| α-[DHEP]SbCl <sub>5</sub>                                              | Solvent-induced                       | Mono response (PL)          | UV light            | [12]      |
| β-[DHEP]SbCl <sub>5</sub> ·2H <sub>2</sub> O                           | Solvent/Thermo-induced                | Mono response (PL)          | UV light            | [12]      |
| β-[DHEP]SbCl <sub>5</sub>                                              | Solvent-induced                       | Mono response (PL)          | UV light            | [12]      |
| [DPA] <sub>3</sub> SbCl <sub>6</sub>                                   | Solvent-induced                       | Mono response (PL)          | UV light            | [13]      |
| β-[Bmmim] <sub>2</sub> SbCl <sub>5</sub>                               | Crystalline-Phase-Recognition-Induced | Mono response (PL)          | UV light            | [14]      |

**Table S6.** The stimulus, response mode and trigger condition of hybrid metal halides in anti-counterfeiting applications.

| Compounds                         | Stimulus        | Response mode         | Trigger Condition     | Ref. |
|-----------------------------------|-----------------|-----------------------|-----------------------|------|
| $(C_6N_2H_{16})MnBr_4$            | Solvent-induced | Mono response (PL)    | UV light              | [15] |
| $C_6N_2H_{16}MnBr_4(H_2O)_2$      | Solvent-induced | Mono response (PL)    | UV light              | [15] |
| $(EtTPP)_2MnBr_4$                 | Solvent-induced | Mono response (PL)    | UV light              | [16] |
| $(R/S)-(C_{12}H_{16}N_2)ZnBr_4$   | Thermo-induced  | Dual response (PL+CD) | UV light/CPL detector | [16] |
| $(R/S)-(C_{12}H_{15}N_2)_2ZnBr_4$ | Solvent-induced | Dual response (PL+CD) | UV light/CPL detector | [17] |

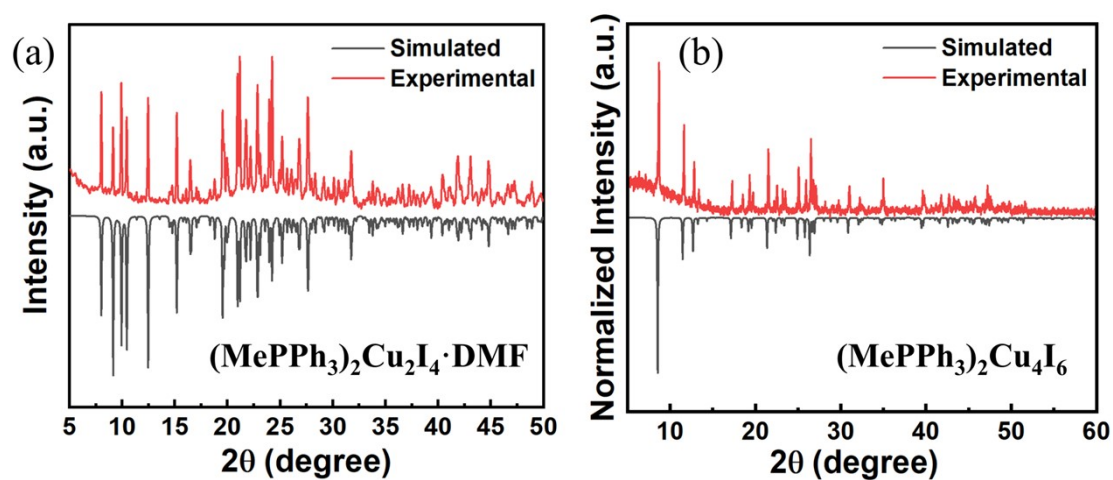

**Figure S1.** The simulated and experimental powder XRD patterns of (a)  $(\text{MePPh}_3)_2\text{Cu}_2\text{I}_4 \cdot \text{DMF}$  and (b)  $(\text{MePPh}_3)_2\text{Cu}_4\text{I}_6$ .

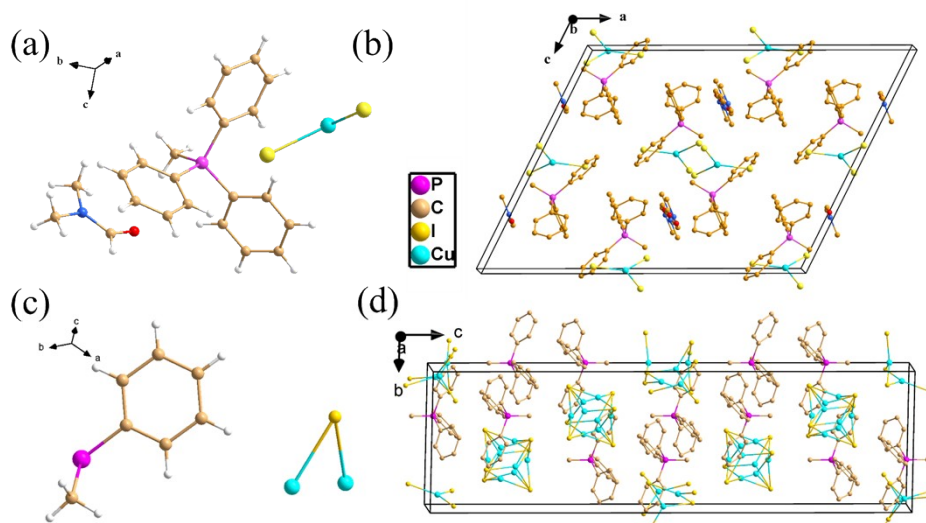

**Figure S2.** Asymmetric units and unit cell diagram of (a, b)  $(\text{MePPh}_3)_2\text{Cu}_2\text{I}_4 \cdot \text{DMF}$  and (c, d)  $(\text{MePPh}_3)_2\text{Cu}_4\text{I}_6$ .

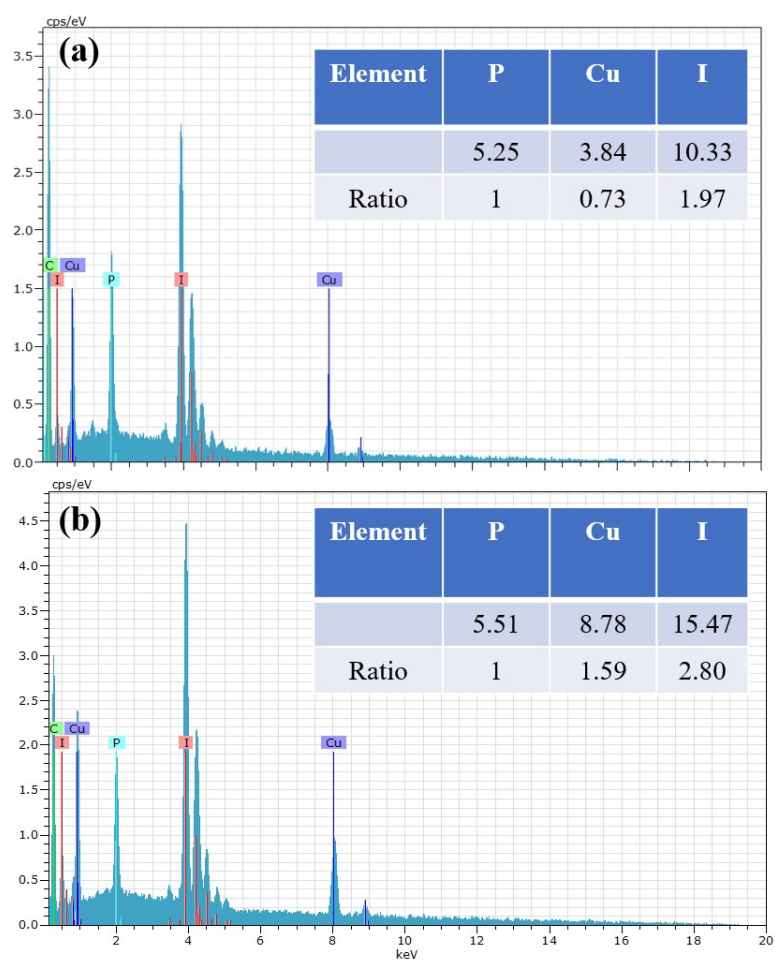

**Figure S3.** The EDS analysis for (a)  $(\text{MePPh}_3)_2\text{Cu}_2\text{I}_4 \cdot \text{DMF}$  and (b)  $(\text{MePPh}_3)_2\text{Cu}_4\text{I}_6$ .

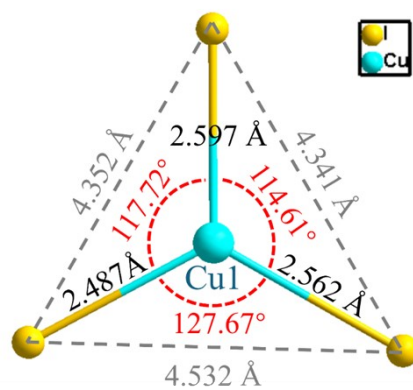

**Figure S4.** The bond lengths and bond angles of  $(\text{MePPh}_3)_2\text{Cu}_2\text{I}_4 \cdot \text{DMF}$ .

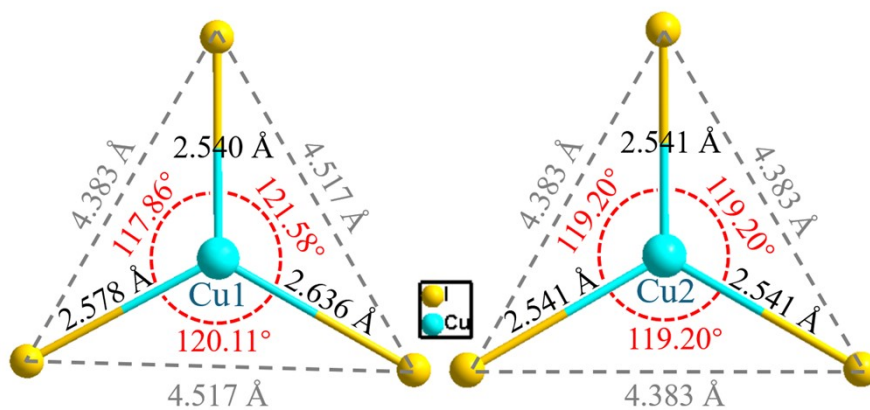

**Figure S5.** The bond lengths and bond angles of  $(\text{MePPh}_3)_2\text{Cu}_4\text{I}_6$ .

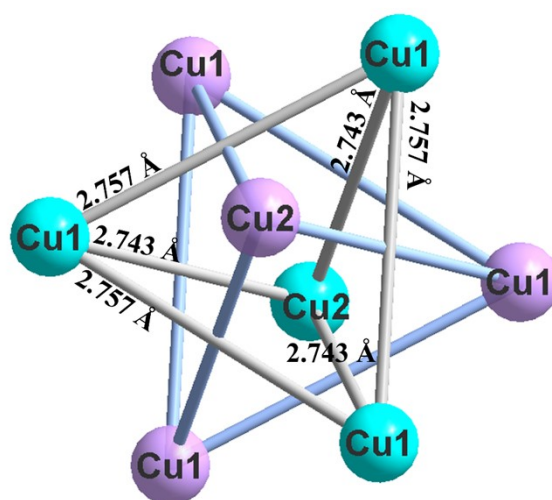

**Figure S6.** A detailed view of the distorted Cu cluster skeleton in  $(\text{MePPh}_3)_2\text{Cu}_4\text{I}_6$ .

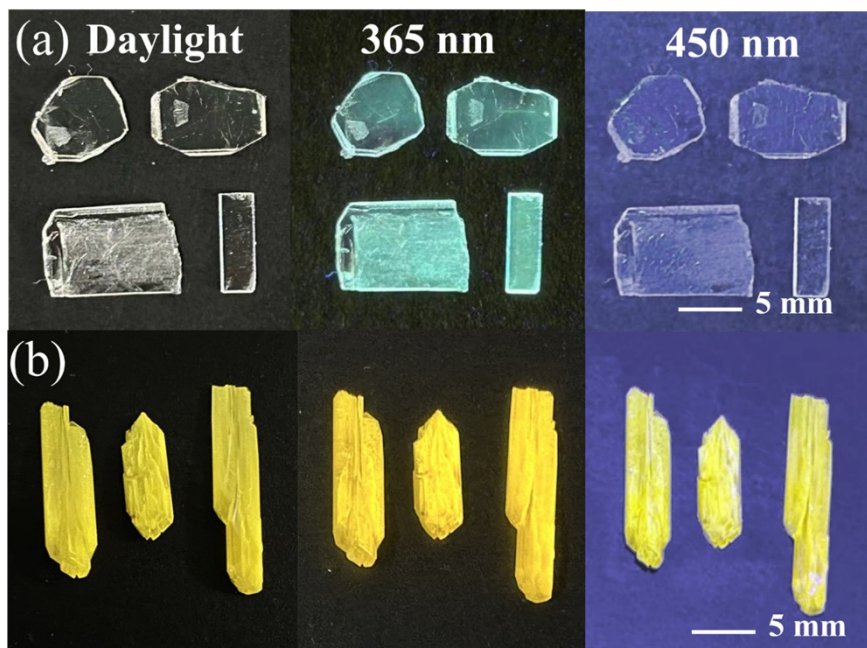

**Figure S7.** The optical photographs of (a) (MePPh<sub>3</sub>)<sub>2</sub>Cu<sub>2</sub>I<sub>4</sub>·DMF and (b) (MePPh<sub>3</sub>)<sub>2</sub>Cu<sub>4</sub>I<sub>6</sub>.

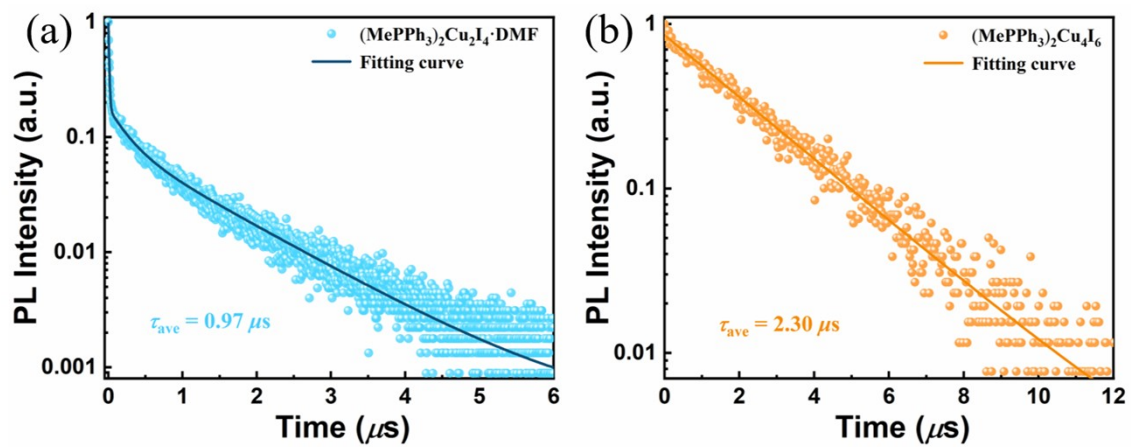

**Figure S8.** The PL decay lifetime of for (a) (MePPh<sub>3</sub>)<sub>2</sub>Cu<sub>2</sub>I<sub>4</sub>·DMF and (b) (MePPh<sub>3</sub>)<sub>2</sub>Cu<sub>4</sub>I<sub>6</sub>.



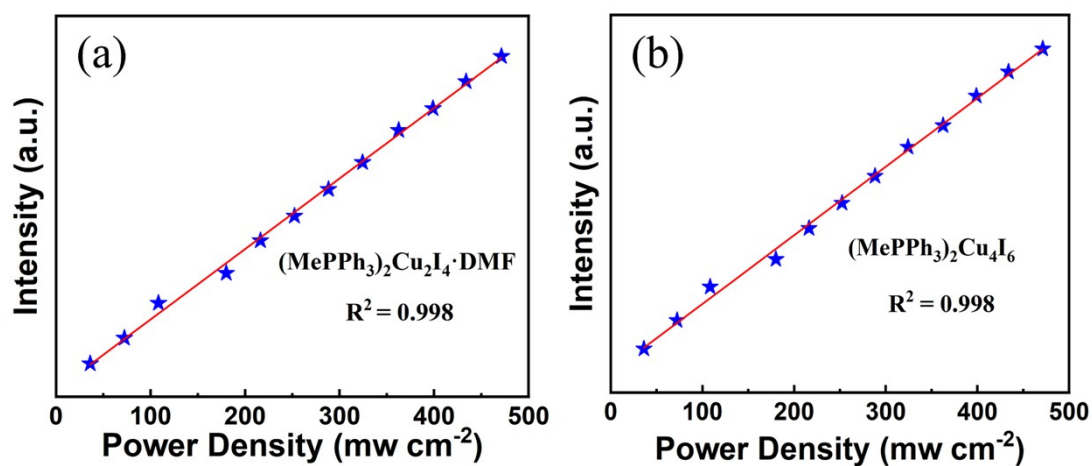

**Figure S9.** Power density dependent PL intensity of (a) (MePPh<sub>3</sub>)<sub>2</sub>Cu<sub>2</sub>I<sub>4</sub>·DMF and (b) (MePPh<sub>3</sub>)<sub>2</sub>Cu<sub>4</sub>I<sub>6</sub>.

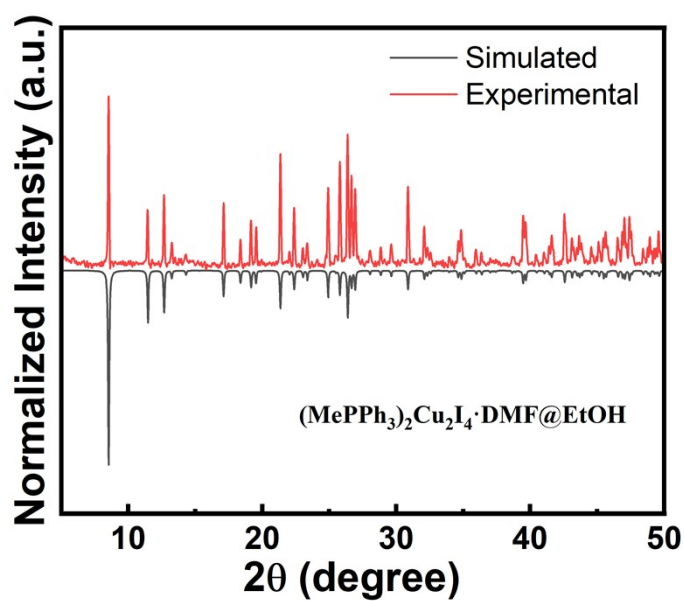

**Figure S10.** The simulated and experimental powder XRD patterns of (a) (MePPh<sub>3</sub>)<sub>2</sub>Cu<sub>2</sub>I<sub>4</sub>·DMF under ethanol stimulus.

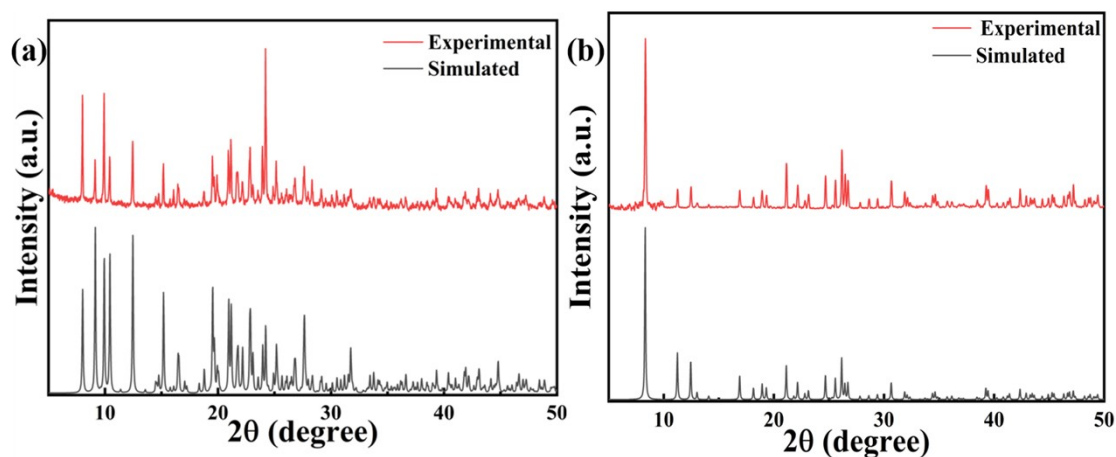

**Figure S11** The Powder XRD patterns of (a)  $(\text{MePPh}_3)_2\text{Cu}_2\text{I}_4 \cdot \text{DMF}$  and (b)  $(\text{MePPh}_3)_2\text{Cu}_4\text{I}_6$  after storage in the ambient air for ten days.

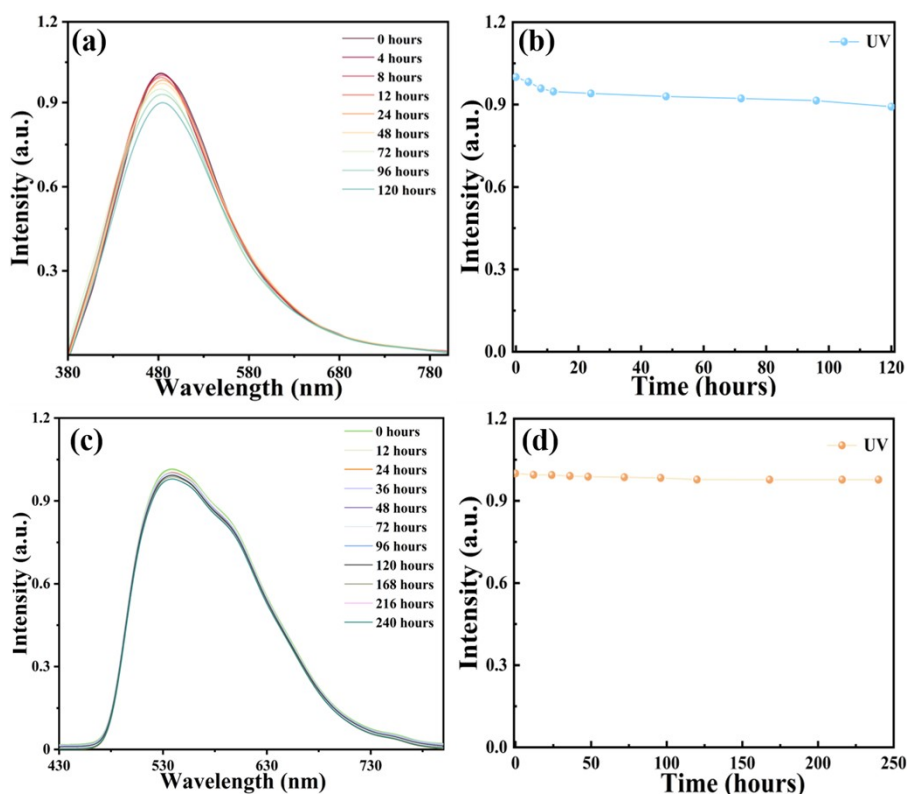

**Figure S12.** The time-dependent PL intensity spectra of (a, b)  $(\text{MePPh}_3)_2\text{Cu}_2\text{I}_4 \cdot \text{DMF}$  and (c, d)  $(\text{MePPh}_3)_2\text{Cu}_4\text{I}_6$  with time under the continuous irradiation with 40 W UV light.

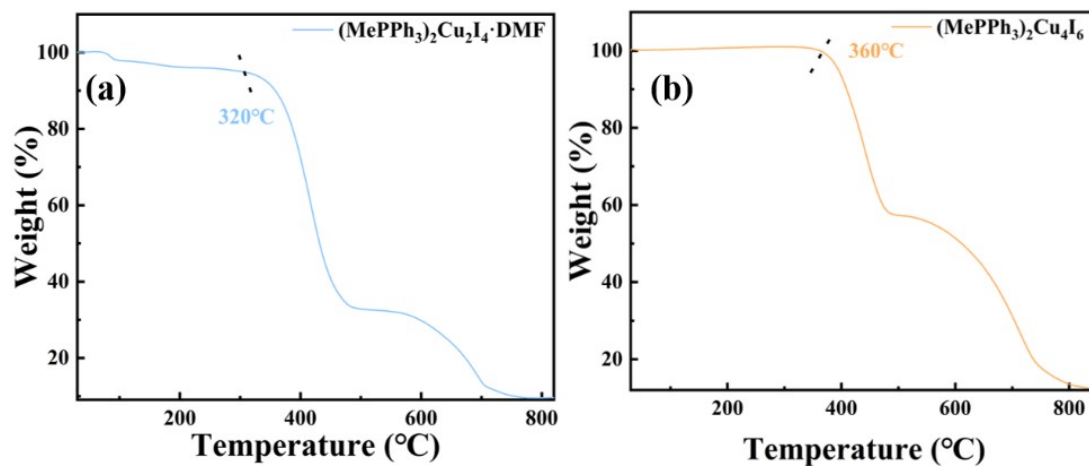

Figure S13. The TGA curves of (a)  $(\text{MePPh}_3)_2\text{Cu}_2\text{I}_4 \cdot \text{DMF}$  and (b)  $(\text{MePPh}_3)_2\text{Cu}_4\text{I}_6$ .

- [1]. T. Xu, Y. Li, M. Nikl, R. Kucerkova, Z. Zhou, J. Chen, Y. Y. Sun, G. Niu, J. Tang, Q. Wang, G. Ren, Y. Wu, Lead-Free Zero-Dimensional Organic-Copper(I) Halides as Stable and Sensitive X-ray Scintillators, *ACS Appl. Mater. Interfaces*, 2022, **14**, 14157.
- [2]. D. A. Popy, Y. Singh, Y. Tratsiak, A. M. Cardoza, J. M. Lane, L. Stand, M. Zhuravleva, N. Rai, B. Saparov, Stimuli-responsive Photoluminescent Copper(I) Halides for Scintillation, Anticounterfeiting, and Light-Emitting Diode Applications, *Aggregate*, 2024, **5**, e602.
- [3]. X. Liu, F. Yuan, C. Zhu, J. Li, X. Lv, G. Xing, Q. Wei, G. Wang, J. Dai, H. Dong, J. Xu, B. Jiao, Z. Wu, Near-Unity Blue Luminance from Lead-Free Copper Halides for Light-Emitting Diodes, *Nano Energy*, 2022, **91**, 106664.
- [4]. K. Chen, B. Chen, L. Xie, X. Li, X. Chen, N. Lv, K. Zheng, Z. Liu, H. Pi, Z. Lin, A. L. Rogach, Organic-Inorganic Copper Halide Compound with a Near-Unity Emission: Large-Scale Synthesis and Diverse Light-Emitting Applications, *Adv. Funct. Mater.*, 2024, **34**, 2310561.
- [5]. S. Chen, J. Gao, J. Chang, Y. Li, C. Huangfu, H. Meng, Y. Wang, G. Xia, L. Feng, Family of Highly Luminescent Pure Ionic Copper(I) Bromide Based Hybrid Materials, *ACS. Appl. Mater. Interfaces*, 2019, **11**, 17513.
- [6]. J. Wu, J.-L. Qi, Y. Guo, S. Yan, W. Liu, S.-P. Guo, Reversible Tri-state Structural Transitions of Hybrid Copper(I) Bromides toward Tunable Multiple Emissions. *Inorg. Chem. Front.*, 2024, **11**, 156.
- [7]. D.-Y. Li, J.-H. Wu, X.-Y. Wang, X.-Y. Zhang, C.-Y. Yue, X.-W. Lei, Reversible Triple-Mode Photo- and Radioluminescence and Nonlinear Optical Switching in Highly Efficient 0D Hybrid Cuprous Halides, *Chem. Mater.*, 2023, **35**, 6598.
- [8]. Y. Tian, H. Peng, Q. Wei, Y. Chen, J. Xia, W. Lin, C. Peng, X. He, B. Zou, Moisture-Induced Reversible Structure Conversion of Zero-Dimensional Organic Cuprous Bromide Hybrids for Multiple Photoluminescent Anti-Counterfeiting, Information Encryption and Rewritable Luminescent Paper, *Chem. Eng. J.*, 2023, **458**, 141436.
- [9]. J. Q. Zhao, Y. Y. Ma, X. J. Zhao, Y. J. Gao, Z. Y. Xu, P. C. Xiao, C. Y. Yue, X. W. Lei, Stepwise Crystalline Structural Transformation in 0D Hybrid Antimony Halides with Triplet Turn-on and Color-Adjustable Luminescence Switching, *Research*, 2023, **6**, 0094.

- [10]. J. B. Luo, J. H. Wei, Z. Z. Zhang, D. B. Kuang, Water-Molecule-Induced Emission Transformation of Zero-Dimension Antimony-Based Metal Halide, *Inorg. Chem.*, 2022, **61**, 338.
- [11]. Z. Wang, Z. Zhang, L. Tao, N. Shen, B. Hu, L. Gong, J. Li, X. Chen, X. Huang, Hybrid Chloroantimonates(III): Thermally Induced Triple-Mode Reversible Luminescent Switching and Laser-Printable Rewritable Luminescent Paper, *Angew. Chem. Int. Ed.* 2019, **58**, 9974.
- [12]. D.-Y. Li, J.-H. Song, Z.-Y. Xu, Y.-J. Gao, X. Yin, Y.-H. Hou, L.-J. Feng, C.-Y. Yue, H. Fei, X.-W. Lei, Reversible Triple-Mode Switching in Photoluminescence from 0D Hybrid Antimony Halides, *Chem. Mater.*, 2022, **34**, 6985.
- [13]. J.-Q. Zhao, H.-S. Shi, L.-R. Zeng, H. Ge, Y.-H. Hou, X.-M. Wu, C.-Y. Yue, X.-W. Lei, Highly Emissive Zero-Dimensional Antimony Halide for Anti-counterfeiting and Confidential Information Encryption-Decryption, *Chem. Eng. J.*, 2022, **431**, 134336.
- [14]. Z. Zhang, Y. Lin, J. Jin, L. Gong, Y. Peng, Y. Song, N. Shen, Z. Wang, K. Du, X. Huang, Crystalline-Phase-Recognition-Induced Domino Phase Transition and Luminescence Switching for Advanced Information Encryption, *Angew. Chem. Int. Ed.*, 2021, **60**, 23373.
- [15]. H. L. Liu, H. Y. Ru, M. E. Sun, Z. Y. Wang, S. Q. Zang, Organic–Inorganic Manganese Bromide Hybrids with Water-Triggered Luminescence for Rewritable Paper, *Adv. Opt. Mater.*, 2022, **10**, 2101700.
- [16]. C. Sun, H. Lu, C. Y. Yue, H. Fei, S. Wu, S. Wang, X. W. Lei, Multiple Light Source-Excited Organic Manganese Halides for Water-Jet Rewritable Luminescent Paper and Anti-Counterfeiting, *ACS Appl. Mater. Interfaces*, 2022, **14**, 56176.
- [17]. D. Y. Liu, L. Y. Xiong, X. Y. Dong, Z. Han, H. L. Liu, S. Q. Zang, Reversible Local Protonation-Deprotonation: Tuning Stimuli-Responsive Circularly Polarized Luminescence in Chiral Hybrid Zinc Halides for Anti-Counterfeiting and Encryption, *Angew. Chem. Int. Ed.*, 2024, **63**, e202410416.
